# Supplementary material for: Effects of Angiotensin-II Receptor Blocker on Inhibition of Thrombogenicity in a Canine Atrial Fibrillation Model
Source: PubMed Central journal article supplement — Korean Circ J. 2016 Apr 26;46(3):335–42. doi: 10.4070/kcj.2016.46.3.335 (PMC4891598; doi:10.4070/kcj.2016.46.3.335), 2016-04-26
Supplement: kcj-46-335-s001.pdf [file kcj-46-335-s001.pdf]

**Supplementary Table.** Serum levels of biomarkers at baseline

|                    |          | Sham       | Control     | Candesartan | p     |
|--------------------|----------|------------|-------------|-------------|-------|
| TIMP-1 (ng/mL)     | Arterial | 6.5±0.4    | 4.3±1.2     | 4.9±1.1     | 0.123 |
|                    | Venous   | 7.1±1.3    | 6.4±2.1     | 5.8±1.9     | 0.243 |
| vWF (ng/mL)        | Arterial | 156.4±40.6 | 148.2±24.3  | 215.8±88.4  | 0.683 |
|                    | Venous   | 130.9±24.5 | 162.9±95.2  | 240.1±120.5 | 0.276 |
| P-selectin (ng/mL) | Arterial | 3.6±1.1    | 9.1±7.1     | 5.1±3.3     | 0.842 |
|                    | Venous   | 18.2±10.3  | 3.9±1.4     | 8.46±0.0    | 0.145 |
| VCAM-1 (ng/mL)     | Arterial | 153.1±63.4 | 174.2±169.1 | 385.5±0.0   | 0.368 |
|                    | Venous   | 163.6±55.6 | 110.8±12.2  | 110.8±50.3  | 0.602 |

Data are expressed as mean±standard error of mean. p for sham vs. control vs. ARBs were determined by Kruskal-Wallis test. TIMP-1: tissue inhibitor of matrix metalloproteinase-1, vWF: von Willebrand factor, VCAM-1: vascular cell adhesion molecule-1, ARB: angiotensin-II receptor blocker
